# Supplementary material for: Photobiocatalytic decarboxylation for olefin synthesis
Source: Royal Society of Chemistry journal article supplement (doi:10.1039/c4cc07276f), 2014-12-11
Supplement: c4cc07276f1.pdf [file c4cc07276f1.pdf]

## Supporting Information

### Photobiocatalytic decarboxylation for olefin synthesis

Ioannis Zachos<sup>a</sup>, Sarah Katharina Gaßmeyer<sup>a</sup>, Daniel Bauer<sup>b</sup>, Volker Sieber<sup>b</sup>, Frank Hollmann<sup>c\*</sup>, Robert Kourist<sup>a\*</sup>

*Junior Research Group for Microbial Biotechnology, Ruhr-Universität Bochum, Universitätsstr. 150, 44780 Bochum (Germany) \*E-mail: Robert.Kourist@rub.de*

### Table of contents

|                                                       |           |
|-------------------------------------------------------|-----------|
| <b>Material and Methods</b> .....                     | <b>S1</b> |
| <b>Enzymatic decarboxylation of fatty acids</b> ..... | <b>S1</b> |
| <b>Supporting Figures</b> .....                       | <b>S2</b> |

### Material and Methods

#### Enzymatic decarboxylation of fatty acids

To 70 mL of a solution of stearic acid (0.5 mM) in Tris-HCl buffer (50 mM Tris, 200 mM NaCl, pH 7.5), cell-free extract containing recombinantly expressed OleT<sub>JE</sub> (7 mL), FMN (0.05 mM) and EDTA (50 mM) were added and incubated in a beaker at 28 °C. The beaker was illuminated using a white light bulb. After 15 h, the solution was acidified with hydrochloric acid (1 M) and extracted twice with ethyl acetate. The organic phase was washed twice with brine. Evaporation of the ethyl acetate, dissolution in n-hexane and washing with brine yielded 9 mg of a white solid containing a mixture of 1-heptadecene (74 %), β-hydroxy-stearic acid (21 %) and stearic acid (5 %), corresponding to 95% conversion of the starting material. Formation of 1- heptadecene and β-hydroxy-stearic acid was monitored by gas chromatography using a HP-5-MS column (30 m by 0.25 mm; 0.25 μm film) on a GC2010 device (Shimadzu Corp., Kyoto, Japan) with an FID detector or a GC/MS ITS40 device (Varian Deutschland GmbH, Darmstadt, Germany) using myristic acid as internal standard. To prevent degradation of hydroxy-fatty acids in the injector, samples were derivatized with an equal volume of N,O-bis(trimethylsilyl)trifluoro-acetamide with 1% trimethylchlorosilane (Sigma-Aldrich, Steinheim, Germany) to silylate the hydroxyl group. Stearic acid, 1-heptadecene and β-hydroxystearic acid were identified by comparison to their TMS-derivatized authentic standards. Formation of 1-heptadecene was further confirmed by NMR-analysis of the reaction product.

**1-Heptadecene:** yield: 6.5 mg (56% purity). <sup>1</sup>H NMR: δ=0.88 (3H, t, CH<sub>3</sub>), 1.2 (26H, m, CH<sub>2</sub>), 2.1 (2H, dt, CH<sub>2</sub>), 4.9 (1H, dd, CHCH<sub>2</sub>), 5.1 (1H, dd, CHCH<sub>2</sub>), 5.8 (1H, m, CH); <sup>13</sup>C NMR: δ = 14.1, 22.7, 29.0-29.7, 29.1, 29.3, 29.5, 29.6, 29.7, 31.9, 33.8, 114.1, 139.3.

72.7 (q, J=33 Hz), 77.0 (s), 79.6 (s), 123.2 (q, J = 285 Hz), 125.9 (s), 129.0 (s), 131.6 (s), 139.7 (s); MS (EI): m/z=238 (M<sup>+</sup>), 111, 97, 83, 69, 55.

## Supporting Figures

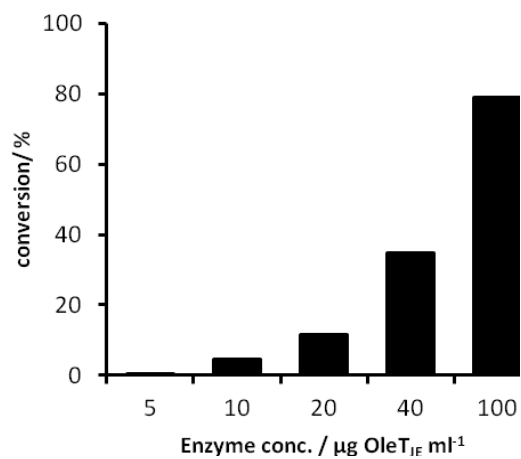

**Figure S1 Photobiocatalytic conversion of stearic acid** using different concentrations of His-tag purified OleTJE. General conditions: buffer: Tris-HCl (50 mM Tris, 200 mM NaCl, pH 7.5), T=25°C, OleTJE, Stearic acid (0.5 mM), FMN (0,01 mM), EDTA (50 mM), reaction volume (2 ml). Samples were taken after 2 h illumination with white light.
